# Supplementary material for: Testing the Limit: Evaluating Drinking Water Arsenic Regulatory Levels Based on Adverse Pregnancy Outcomes in Bangladesh
Source: MDPI journal article supplement (doi:10.3390/toxics10100600), 2022-10-11
Supplement: s1 [file s1]

**Title:** Testing the Limit: Evaluating Drinking Water Arsenic Regulatory Levels Based on Adverse Pregnancy Outcomes in Bangladesh

**Authors:** Faye V. Andrews<sup>1,2</sup>, Adam Branscum<sup>1</sup>, Perry Hystad<sup>1</sup>, Ellen Smit<sup>1</sup>, Sakila Afroz<sup>3</sup>, Mostofa Golam<sup>3</sup>, Omar Sharif<sup>3</sup>, Mohammad Rahman<sup>3</sup>, Quazi Quamruzzaman<sup>3</sup>, David C. Christiani<sup>4</sup>, Molly L. Kile<sup>1</sup>

**Author affiliations:** <sup>1</sup> School of Biological and Population Health Sciences, College of Public Health and Human Sciences, Oregon State University. <sup>2</sup> Oregon Clinical and Translational Research Institute, Oregon Health and Sciences University. <sup>3</sup> Dhaka Community Hospital Trust, Dhaka, Bangladesh. <sup>4</sup> Harvard T.H. Chan School of Public Health, Department of Environmental Health, Harvard University.

## Supplement:

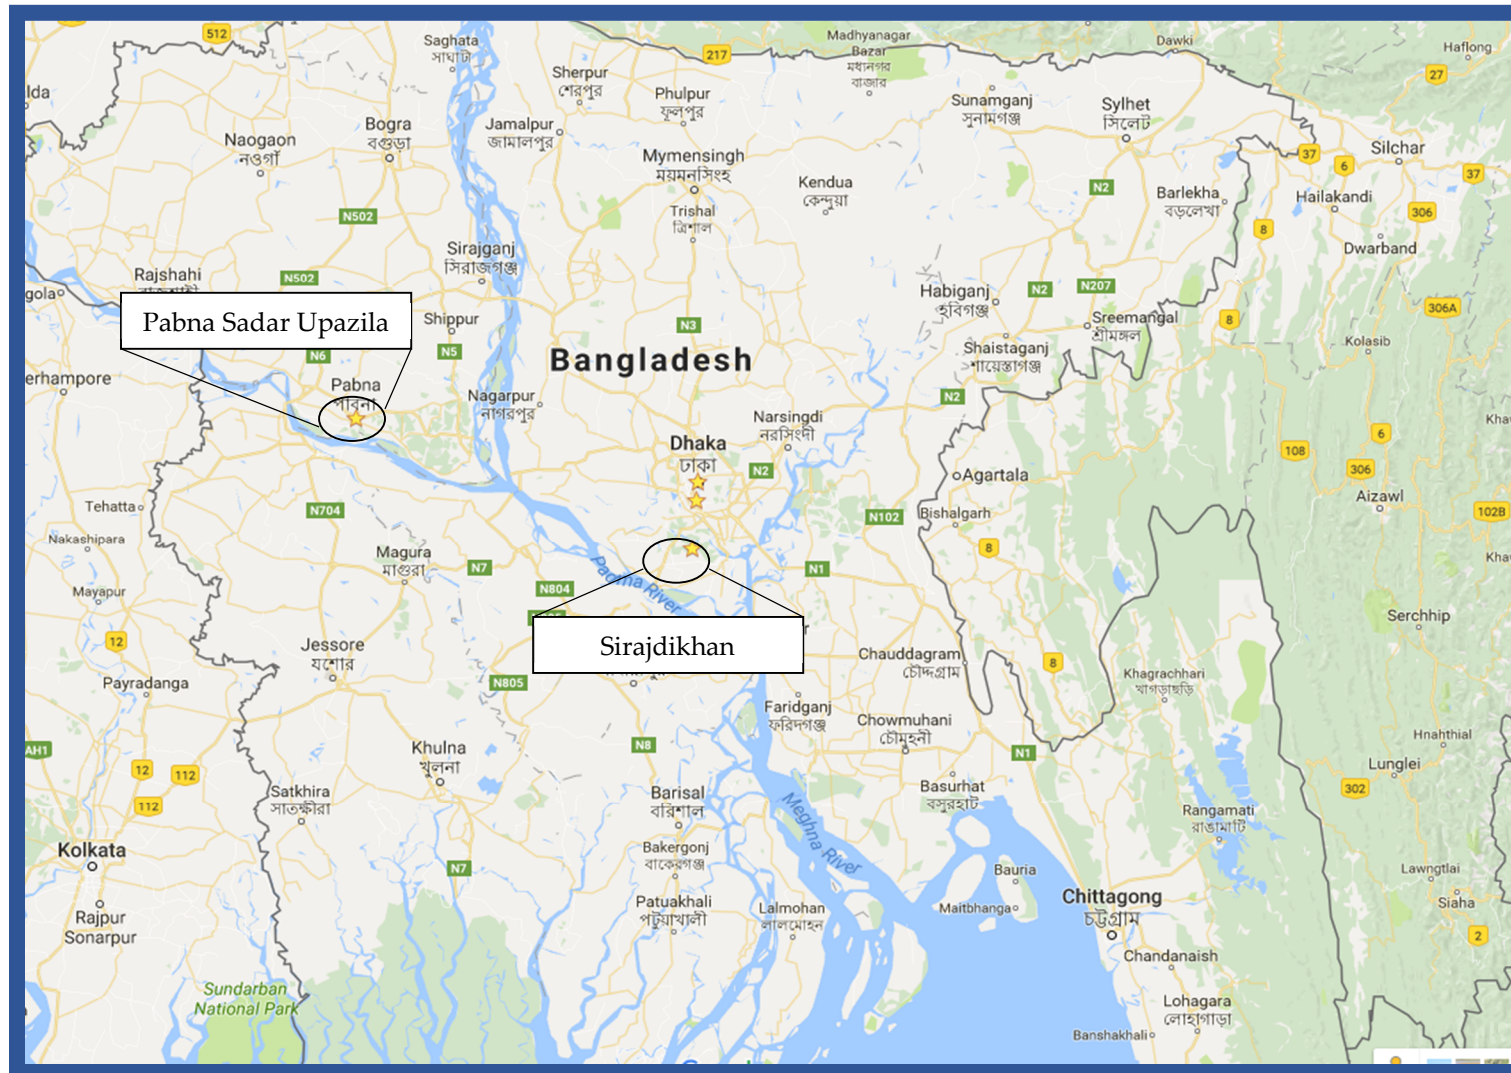

**Figure S1.** Study locations of Pabna Sadar and Sirajdikhan Upazilas in Bangladesh.

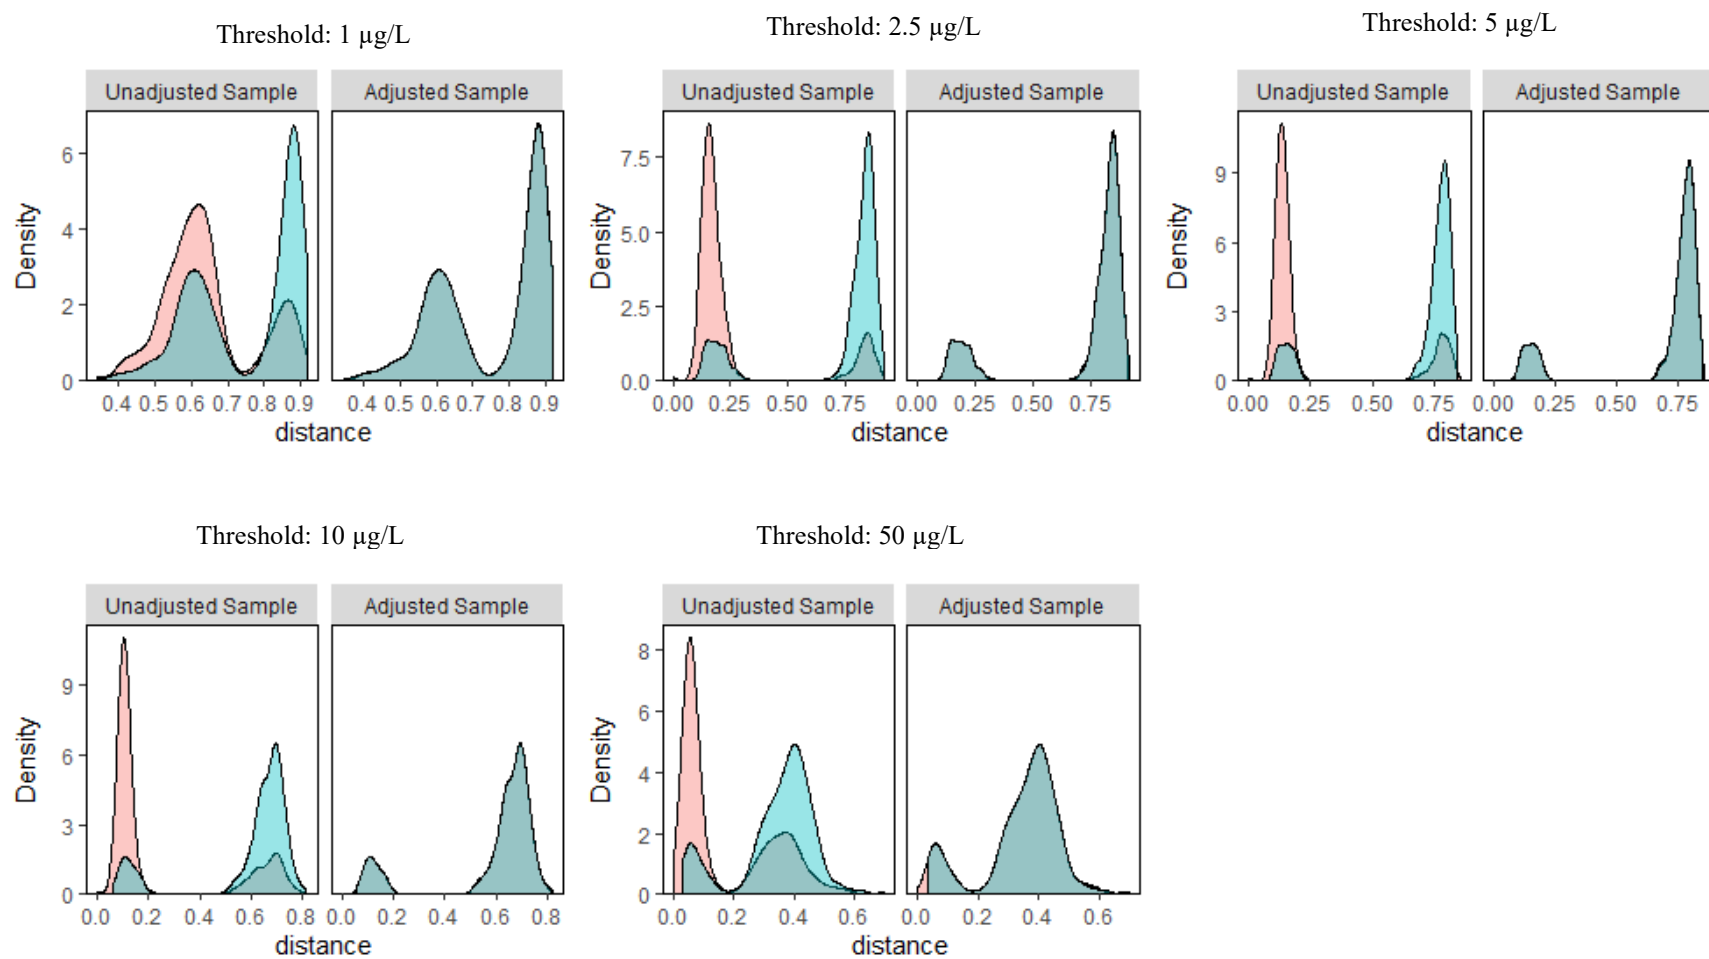

**Figure S2.** Distributional balance of propensity scores by treatments of above and below thresholds of 1  $\mu\text{g/L}$ , 2.5  $\mu\text{g/L}$ , 5  $\mu\text{g/L}$ , 10  $\mu\text{g/L}$ , and 50  $\mu\text{g/L}$ .

**Table S1.** Characteristics of Pregnancy Cohort for unmatched and propensity score matched groups for Miscarriage Outcome.

|                                                  | Unmatched cohort        |                        | Matched cohort*         |                        |
|--------------------------------------------------|-------------------------|------------------------|-------------------------|------------------------|
|                                                  | Live Births<br>(N=1130) | Miscarriage<br>(N=132) | Live Births<br>(N=1120) | Miscarriage<br>(N=117) |
| <b>Age (years)</b>                               |                         |                        |                         |                        |
| Mean (SD)                                        | 23.0 (4.22)             | 23.1 (4.45)            | 23.0 (4.22)             | 22.8 (4.06)            |
| Median [Min, Max]                                | 22.0 [18.0, 41.0]       | 22.0 [18.0, 35.0]      | 22.0 [18.0, 41.0]       | 22.0 [18.0, 35.0]      |
| <b>BMI (Kg/m<sup>2</sup>)</b>                    |                         |                        |                         |                        |
| Mean (SD)                                        | 20.5 (3.23)             | 20.8 (3.18)            | 20.5 (3.22)             | 21.0 (3.16)            |
| Median [Min, Max]                                | 20.0 [13.4, 36.0]       | 20.4 [12.6, 29.0]      | 20.0 [13.4, 36.0]       | 20.7 [12.6, 29.0]      |
| <b>Education</b>                                 |                         |                        |                         |                        |
| No school attendance                             | 159 (14.1%)             | 24 (18.2%)             | 159 (14.2%)             | 18 (15.4%)             |
| Primary School                                   | 365 (32.3%)             | 45 (34.1%)             | 362 (32.3%)             | 42 (35.9%)             |
| Secondary School and Higher Education            | 606 (53.6%)             | 63 (47.7%)             | 599 (53.5%)             | 57 (48.7%)             |
| <b>Monthly Household Income (Taka)</b>           |                         |                        |                         |                        |
| >3,000                                           | 188 (16.6%)             | 11 (8.3%)              | 188 (16.8%)             | 11 (9.4%)              |
| 3,001-4,000                                      | 298 (26.4%)             | 25 (18.9%)             | 296 (26.4%)             | 25 (21.4%)             |
| 4,001-5,000                                      | 336 (29.7%)             | 43 (32.6%)             | 335 (29.9%)             | 43 (36.8%)             |
| 5,001+                                           | 301 (26.6%)             | 38 (28.8%)             | 301 (26.9%)             | 38 (32.5%)             |
| Missing                                          | 7 (0.6%)                | 15 (11.4%)             | --                      | --                     |
| <b>Cook Fuel Type</b>                            |                         |                        |                         |                        |
| Clean Fuel                                       | 778 (68.8%)             | 86 (65.2%)             | 772 (68.9%)             | 77 (65.8%)             |
| Less Clean Fuel                                  | 346 (30.6%)             | 46 (34.8%)             | 345 (30.8%)             | 40 (34.2%)             |
| Refused                                          | 3 (0.3%)                | 0 (0%)                 | 3 (0.3%)                | 0 (0%)                 |
| Missing                                          | 3 (0.3%)                | 0 (0%)                 | --                      | --                     |
| <b>Risk of subsequent miscarriage/stillbirth</b> |                         |                        |                         |                        |
| First Born or No Previous                        | 922 (81.6%)             | 105 (79.5%)            | 914 (81.6%)             | 95 (81.2%)             |

|                                                | Unmatched cohort        |                        | Matched cohort*         |                        |
|------------------------------------------------|-------------------------|------------------------|-------------------------|------------------------|
|                                                | Live Births<br>(N=1130) | Miscarriage<br>(N=132) | Live Births<br>(N=1120) | Miscarriage<br>(N=117) |
| Previous Miscarriage/Stillbirth                | 208 (18.4%)             | 27 (20.5%)             | 206 (18.4%)             | 22 (18.8%)             |
| <b>Number of previous births</b>               |                         |                        |                         |                        |
| First Born                                     | 536 (47.4%)             | 68 (51.5%)             | 531 (47.4%)             | 62 (53.0%)             |
| 2nd or Greater Born                            | 594 (52.6%)             | 64 (48.5%)             | 589 (52.6%)             | 55 (47.0%)             |
| <b>Clinic Location</b>                         |                         |                        |                         |                        |
| Pabna                                          | 555 (49.1%)             | 48 (36.4%)             | 553 (49.4%)             | 33 (28.2%)             |
| Sirajdikhan                                    | 575 (50.9%)             | 84 (63.6%)             | 567 (50.6%)             | 84 (71.8%)             |
| <b>Drinking Water Manganese (µg/L)</b>         |                         |                        |                         |                        |
| Mean (SD)                                      | 722 (704)               | 708 (715)              | 714 (692)               | 721 (736)              |
| Median [Min, Max]                              | 590 [0.500, 4720]       | 620 [1.00, 3500]       | 590 [0.500, 4720]       | 639 [1.00, 3500]       |
| <b>Drinking Water Arsenic cut off 1 µg/L</b>   |                         |                        |                         |                        |
| Low                                            | 312 (27.6%)             | 36 (27.3%)             | 309 (27.6%)             | 35 (29.9%)             |
| High                                           | 818 (72.4%)             | 96 (72.7%)             | 811 (72.4%)             | 82 (70.1%)             |
| <b>Drinking Water Arsenic cut off 2.5 µg/L</b> |                         |                        |                         |                        |
| Low                                            | 576 (51.0%)             | 73 (55.3%)             | 569 (50.8%)             | 70 (59.8%)             |
| High                                           | 554 (49.0%)             | 59 (44.7%)             | 551 (49.2%)             | 47 (40.2%)             |
| <b>Drinking Water Arsenic cut off 5 µg/L</b>   |                         |                        |                         |                        |
| < 5 ug/L                                       | 624 (55.2%)             | 78 (59.1%)             | 617 (55.1%)             | 74 (63.2%)             |
| ≥ 5 ug/L                                       | 506 (44.8%)             | 54 (40.9%)             | 503 (44.9%)             | 43 (36.8%)             |
| <b>Drinking Water Arsenic cut off 10 µg/L</b>  |                         |                        |                         |                        |
| < 10 ug/L                                      | 699 (61.9%)             | 88 (66.7%)             | 691 (61.7%)             | 83 (70.9%)             |
| ≥ 10 ug/L                                      | 431 (38.1%)             | 44 (33.3%)             | 429 (38.3%)             | 34 (29.1%)             |
| <b>Drinking Water Arsenic cut off 50 µg/L</b>  |                         |                        |                         |                        |
| < 50 ug/L                                      | 886 (78.4%)             | 108 (81.8%)            | 878 (78.4%)             | 99 (84.6%)             |
| ≥ 50 ug/L                                      | 244 (21.6%)             | 24 (18.2%)             | 242 (21.6%)             | 18 (15.4%)             |

\*Matched using full matching in propensity scores

**Table S2.** Sensitivity analysis comparing traditional modeling approaches and propensity score matching for miscarriage outcome.

| Arsenic cut off level | Type of Model                         |                    |                                      |                    |                                        |                           |                                                    |                     |
|-----------------------|---------------------------------------|--------------------|--------------------------------------|--------------------|----------------------------------------|---------------------------|----------------------------------------------------|---------------------|
|                       | <i>Unadjusted Logistic Regression</i> |                    | <i>*Adjusted Logistic Regression</i> |                    | <i>*Propensity score full matching</i> |                           | <i>*Propensity score nearest neighbor matching</i> |                     |
|                       | <i>Below</i>                          | <i>Above</i>       | <i>Below</i>                         | <i>Above</i>       | <i>Below</i>                           | <i>Above</i>              | <i>Below</i>                                       | <i>Above</i>        |
| <b>1 µg/L</b>         | 1                                     | 0.89 (0.59 – 1.36) | 1                                    | 1.24 (0.80 – 1.93) | 1                                      | 1.10 (0.62 – 1.94)        | 1                                                  | 2.63 (0.56 – 12.39) |
| <b>2.5 µg/L</b>       | 1                                     | 0.69 (0.47 – 1.03) | 1                                    | 1.48 (0.88 – 2.49) | 1                                      | <b>1.90 (1.07 – 3.38)</b> | 1                                                  | 1.47 (0.90 – 2.39)  |
| <b>5 µg/L</b>         | 1                                     | 0.71 (0.48 – 1.06) | 1                                    | 1.53 (0.90 – 2.60) | 1                                      | <b>2.73 (1.49 – 5.02)</b> | 1                                                  | 1.58 (0.96 – 2.60)  |
| <b>10 µg/L</b>        | 1                                     | 0.66 (0.43 – 1.01) | 1                                    | 1.23 (0.72 – 2.10) | 1                                      | 1.18 (0.60 – 2.30)        | 1                                                  | 1.21 (0.73 – 2.01)  |
| <b>50 µg/L</b>        | 1                                     | 0.66 (0.39 – 1.12) | 1                                    | 1.05 (0.58 – 1.89) | 1                                      | 0.66 (0.33 – 1.33)        | 1                                                  | 1.01 (0.50 – 2.05)  |

\*Adjusted for age, BMI, income, education, household cook fuel type, location of clinic, risk of previous miscarriage or stillbirth if not first child, parity, and drinking water manganese.

**Table S3.** Propensity Score Standard Mean Differences between pre-matching and post-matching with full and nearest neighbor methods for arsenic cut-off values of 2.5 and 5 µg/L.

| Covariate                                         | Arsenic Cut-off Value: 2.5 µg/L |                           |                                       | Arsenic Cut-off Value: 5 µg/L |                           |                                       |
|---------------------------------------------------|---------------------------------|---------------------------|---------------------------------------|-------------------------------|---------------------------|---------------------------------------|
|                                                   | <i>Pre-matching</i>             | <i>Post-matching Full</i> | <i>Post-matching Nearest neighbor</i> | <i>Pre-matching</i>           | <i>Post-matching Full</i> | <i>Post-matching Nearest neighbor</i> |
| Distance                                          | 1.7694                          | -0.0008                   | 1.7231                                | 1.7929                        | 0.0001                    | 1.6208                                |
| Location – Pabna                                  | 1.7104                          | -0.0000                   | 1.6833                                | 1.7606                        | 0.0000                    | 1.6264                                |
| Location – Sirajdikhan                            | -1.7104                         | -0.0000                   | -1.6833                               | -1.7606                       | 0.0000                    | -1.6264                               |
| BMI (Body Mass Index)                             | -0.3285                         | -0.1386                   | -0.2118                               | -0.3006                       | -0.1717                   | -0.0630                               |
| Age of participant                                | 0.0250                          | -0.2070                   | 0.0408                                | -0.0061                       | -0.2234                   | 0.0617                                |
| Education – No school attendance                  | 0.2041                          | -0.2071                   | 0.1942                                | 0.1931                        | -0.0603                   | 0.1509                                |
| Education – Primary School attendance             | -0.2739                         | 0.0235                    | -0.2351                               | -0.2634                       | 0.0376                    | -0.1541                               |
| Education – Secondary School and Higher Education | 0.0838                          | 0.1405                    | 0.0572                                | 0.0821                        | 0.0138                    | 0.0184                                |
| Income - >3,000 Taka                              | 0.3885                          | -0.0501                   | 0.3759                                | 0.3718                        | -0.1169                   | 0.3168                                |
| Income - 3,001- 4,000 Taka                        | 0.2355                          | 0.0448                    | 0.2086                                | 0.2072                        | 0.0283                    | 0.0948                                |
| Income – 4,001 – 5,000 Taka                       | -0.2206                         | -0.0138                   | -0.2299                               | -0.1700                       | -0.0056                   | -0.2494                               |
| Income – 5,000 + Taka                             | -0.4703                         | 0.0176                    | -0.4130                               | -0.4831                       | 0.1059                    | -0.1892                               |
| Clean Cook Fuel                                   | -0.2437                         | 0.0744                    | -0.2349                               | -0.2741                       | -0.0626                   | -0.1691                               |
| Less Clean Cook Fuel                              | 0.2534                          | -0.0734                   | 0.2349                                | 0.2830                        | 0.0631                    | 0.1691                                |
| Cook fuel – refused to answer                     | -0.0954                         | -0.0093                   | 0.0000                                | -0.0883                       | -0.0056                   | 0.0000                                |
| Drinking water manganese                          | 0.0620                          | -0.2994                   | 0.0405                                | 0.0464                        | -0.2133                   | -0.0230                               |
| First Born or No Previous Miscarriage/Stillbirth  | -0.1700                         | -0.0009                   | -0.1532                               | -0.1231                       | 0.0019                    | -0.1075                               |
| Previous Miscarriage/Stillbirth                   | 0.1700                          | 0.0009                    | 0.1532                                | 0.1231                        | -0.0019                   | 0.1075                                |
| Parity – first born                               | -0.1808                         | 0.1628                    | -0.1991                               | -0.1771                       | 0.0021                    | -0.2071                               |
| Parity – 2 <sup>nd</sup> or greater born          | 0.1808                          | -0.1628                   | 0.1991                                | 0.1771                        | -0.0021                   | 0.2071                                |
